# Supplementary material
Source: PubMed Central journal article supplement (PMC4993386)

# Figure S1: Intracellular delivery of poly IC leads to MDA-5 induction

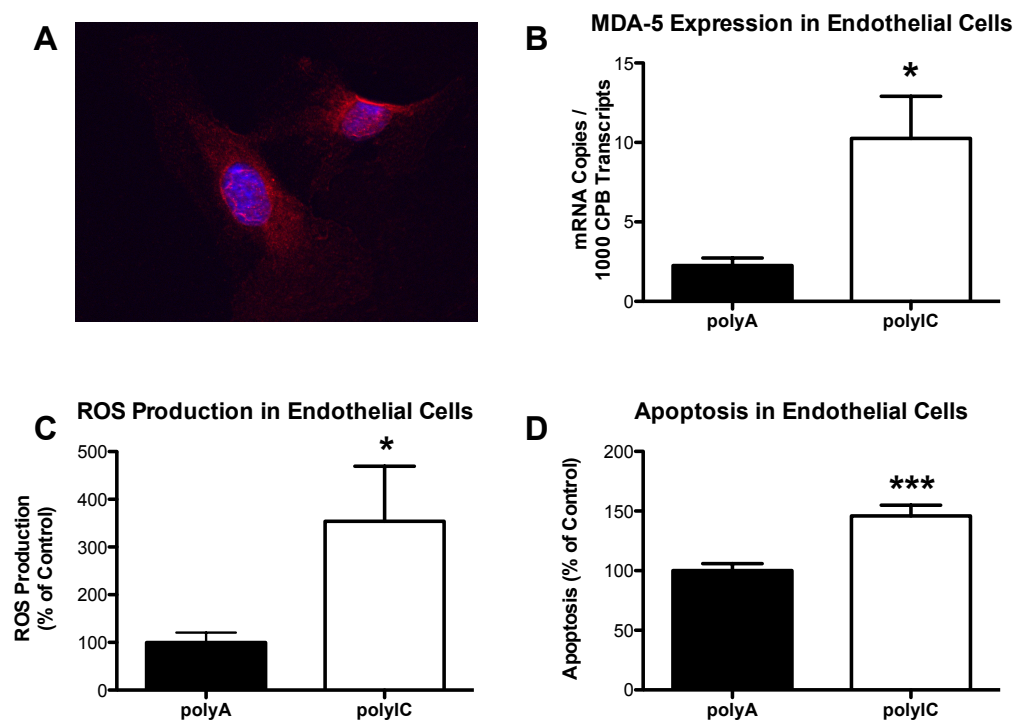

**Figure S2: Intracellular delivery of polyIC in the presence of a TLR3-antagonist leads to MDA-5 induction and IP10 release**

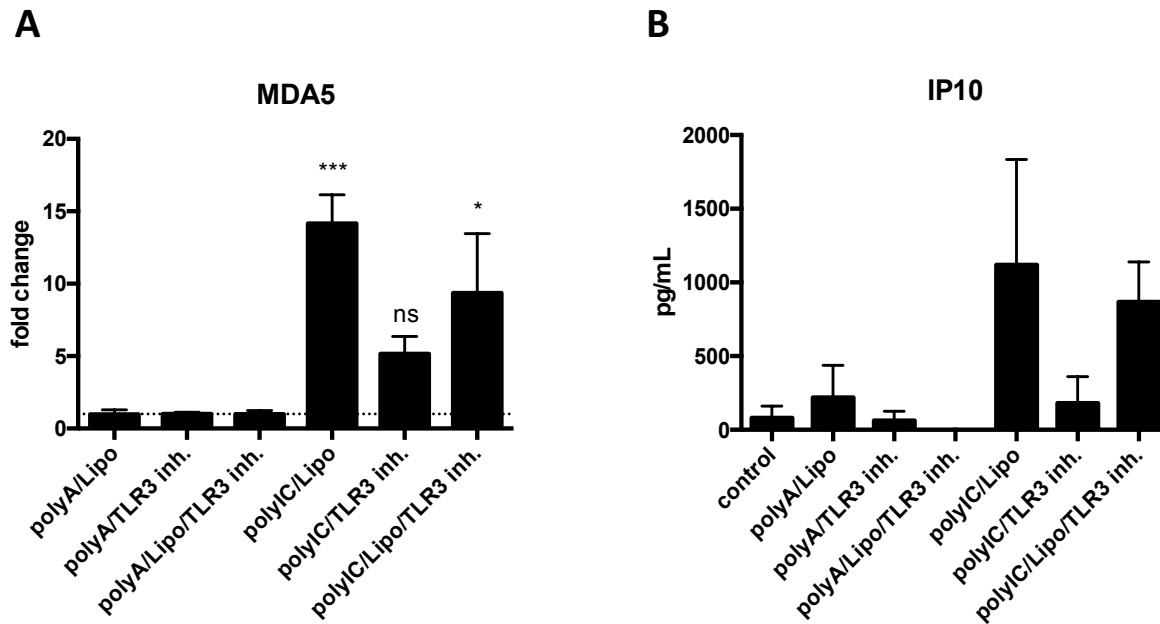

**Figure S3: Gating strategies for endothelial microparticles and sca1/flk1 positive progenitor cells**

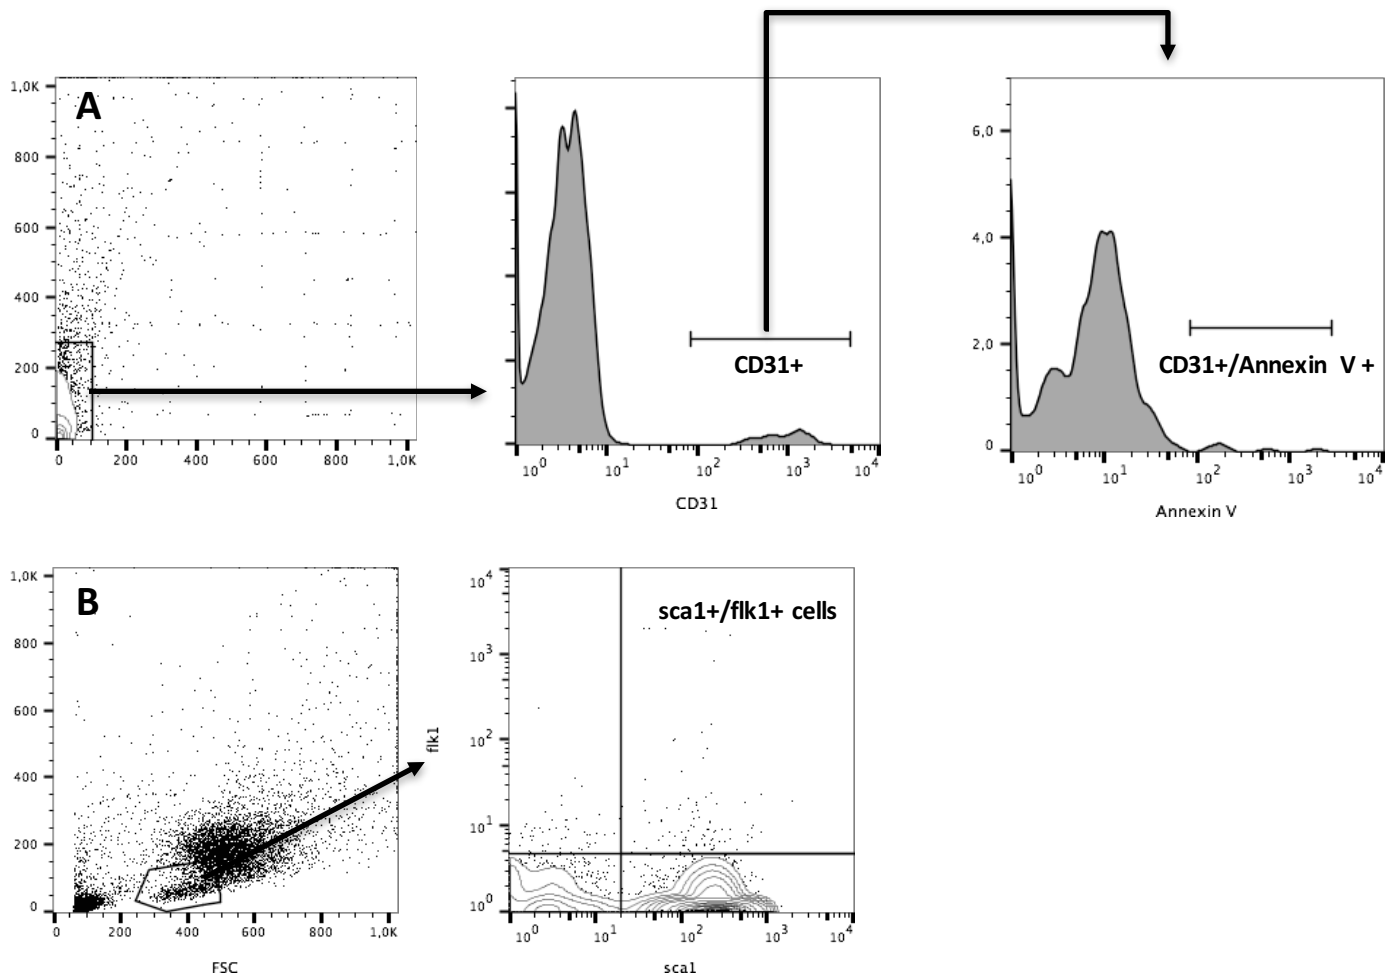

Supplement: JCMM-20-1696-s001.pdf [file JCMM-20-1696-s001.pdf]
